# Supplementary material for: Mitochondrial Genomes Provide Insights into the Phylogeny of Culicomorpha (Insecta: Diptera)
Source: MDPI journal article supplement (doi:10.3390/ijms20030747), 2019-02-11
Supplement: s1 [file s1]

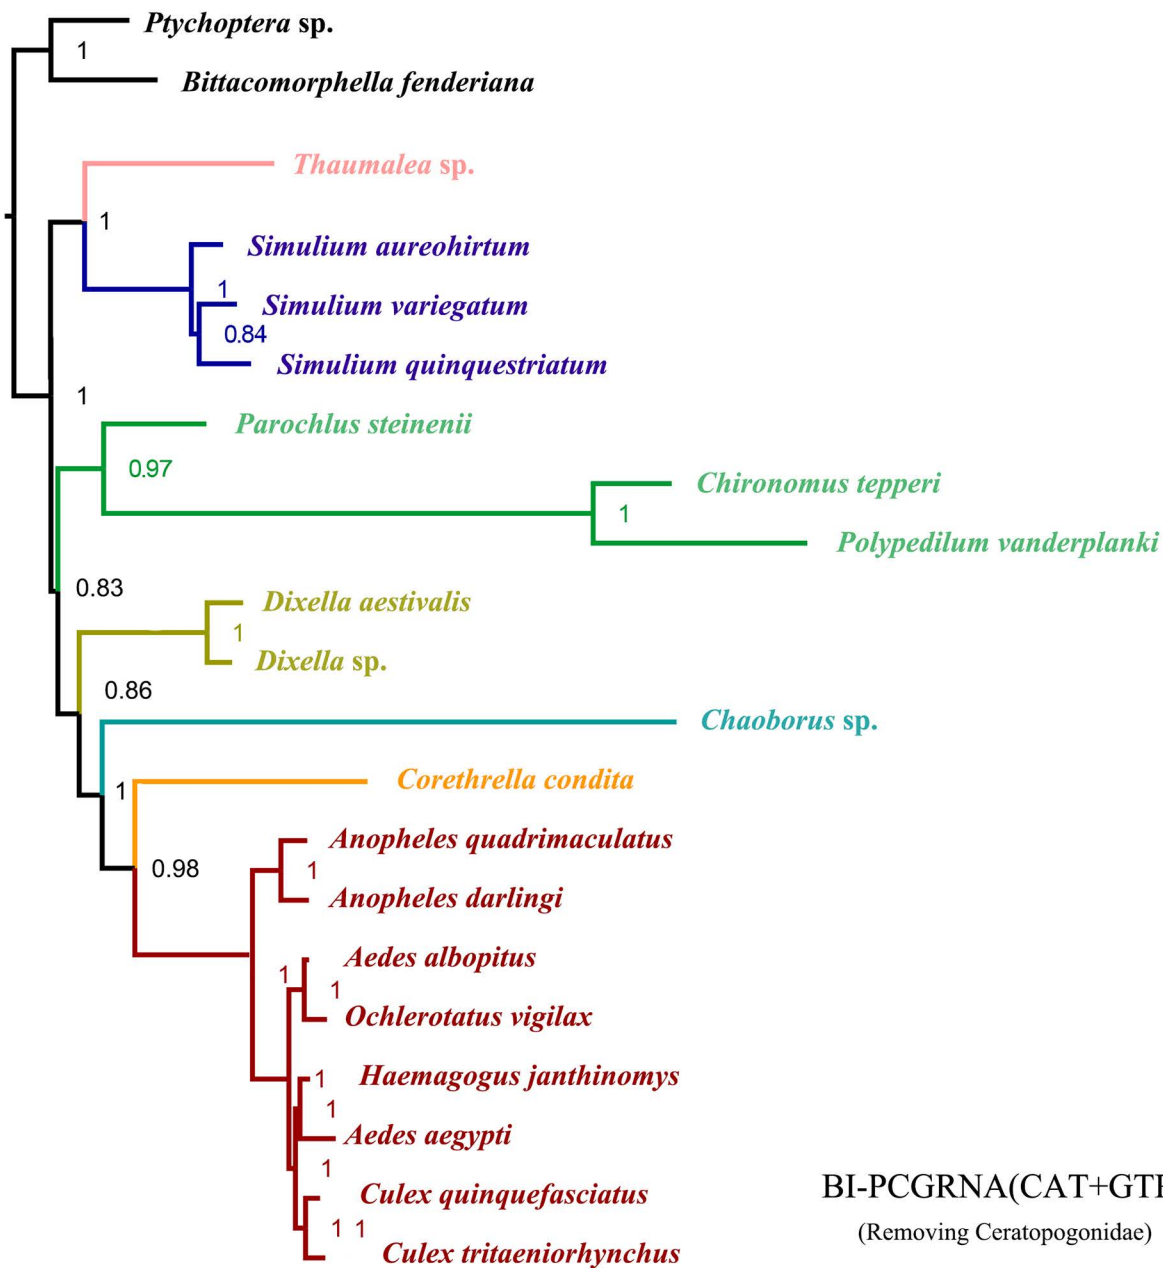

0.5

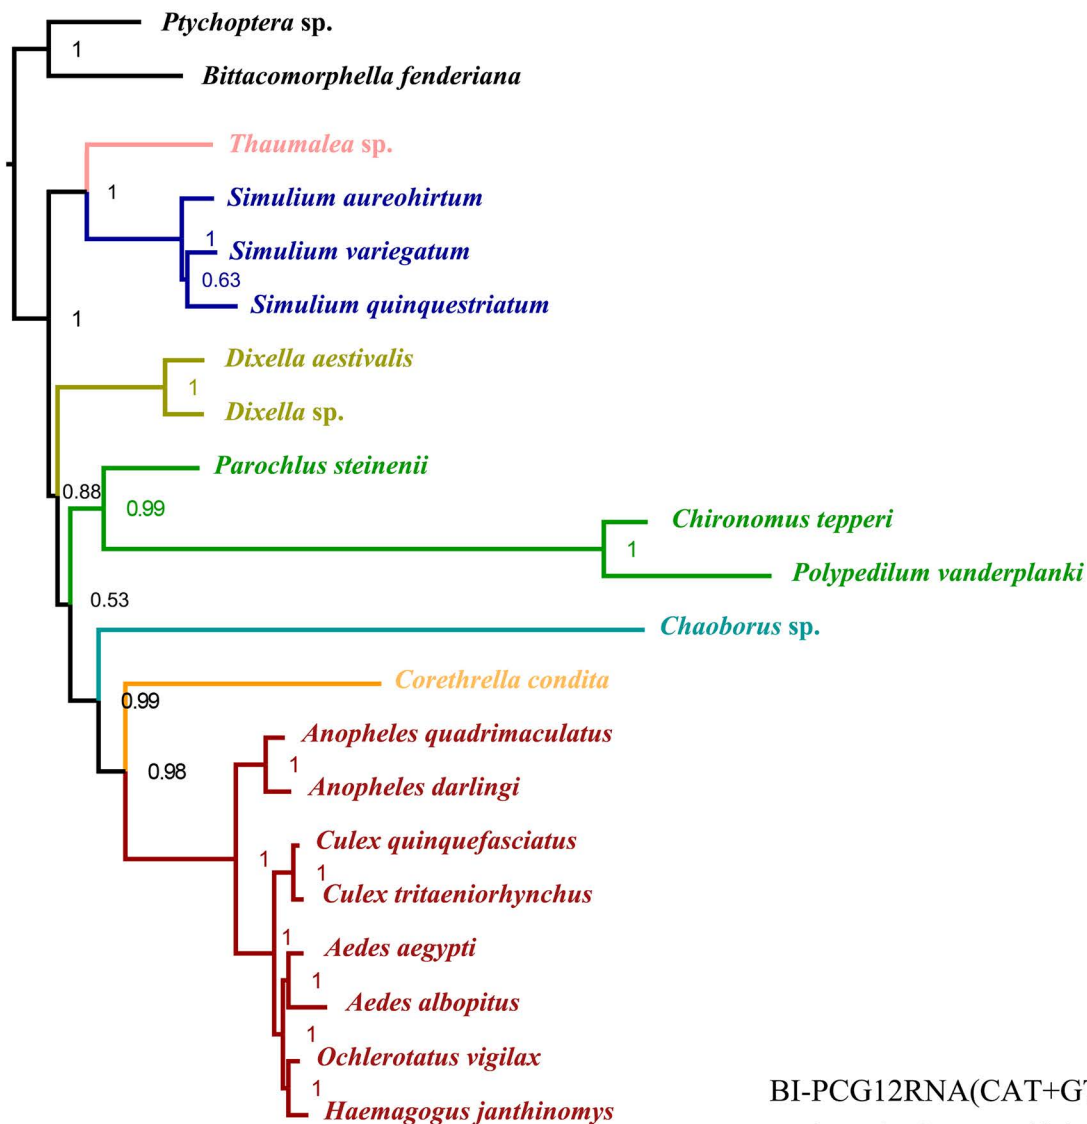

BI-PCG12RNA(CAT+GTR)

(Removing Ceratopogonidae)

0.2

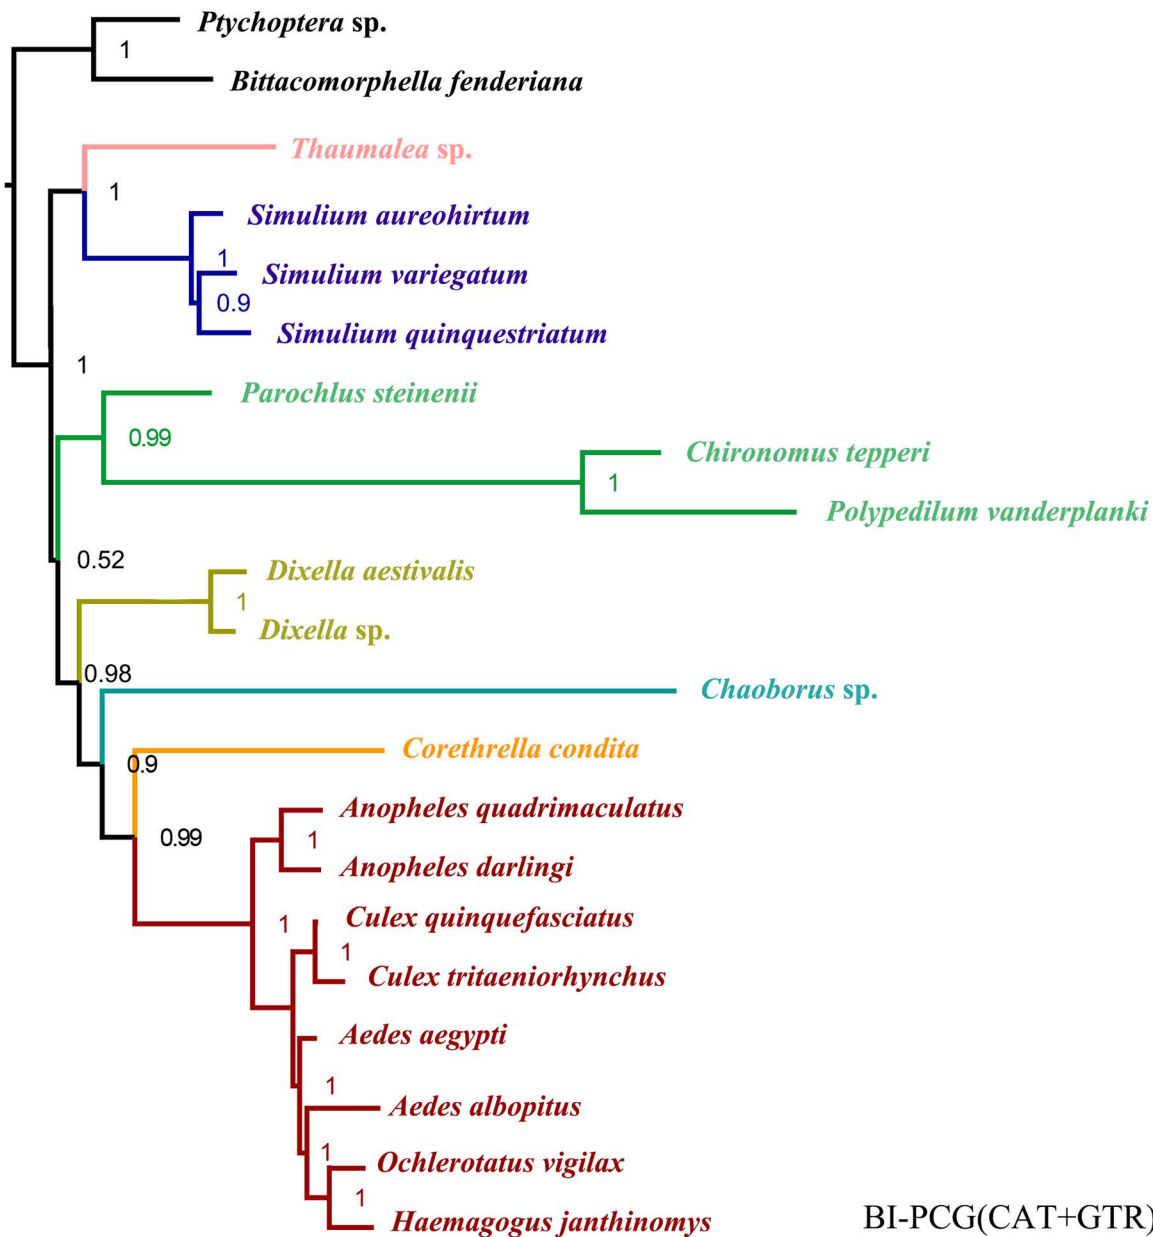

BI-PCG(CAT+GTR)  
(Removing Ceratopogonidae)

0.5

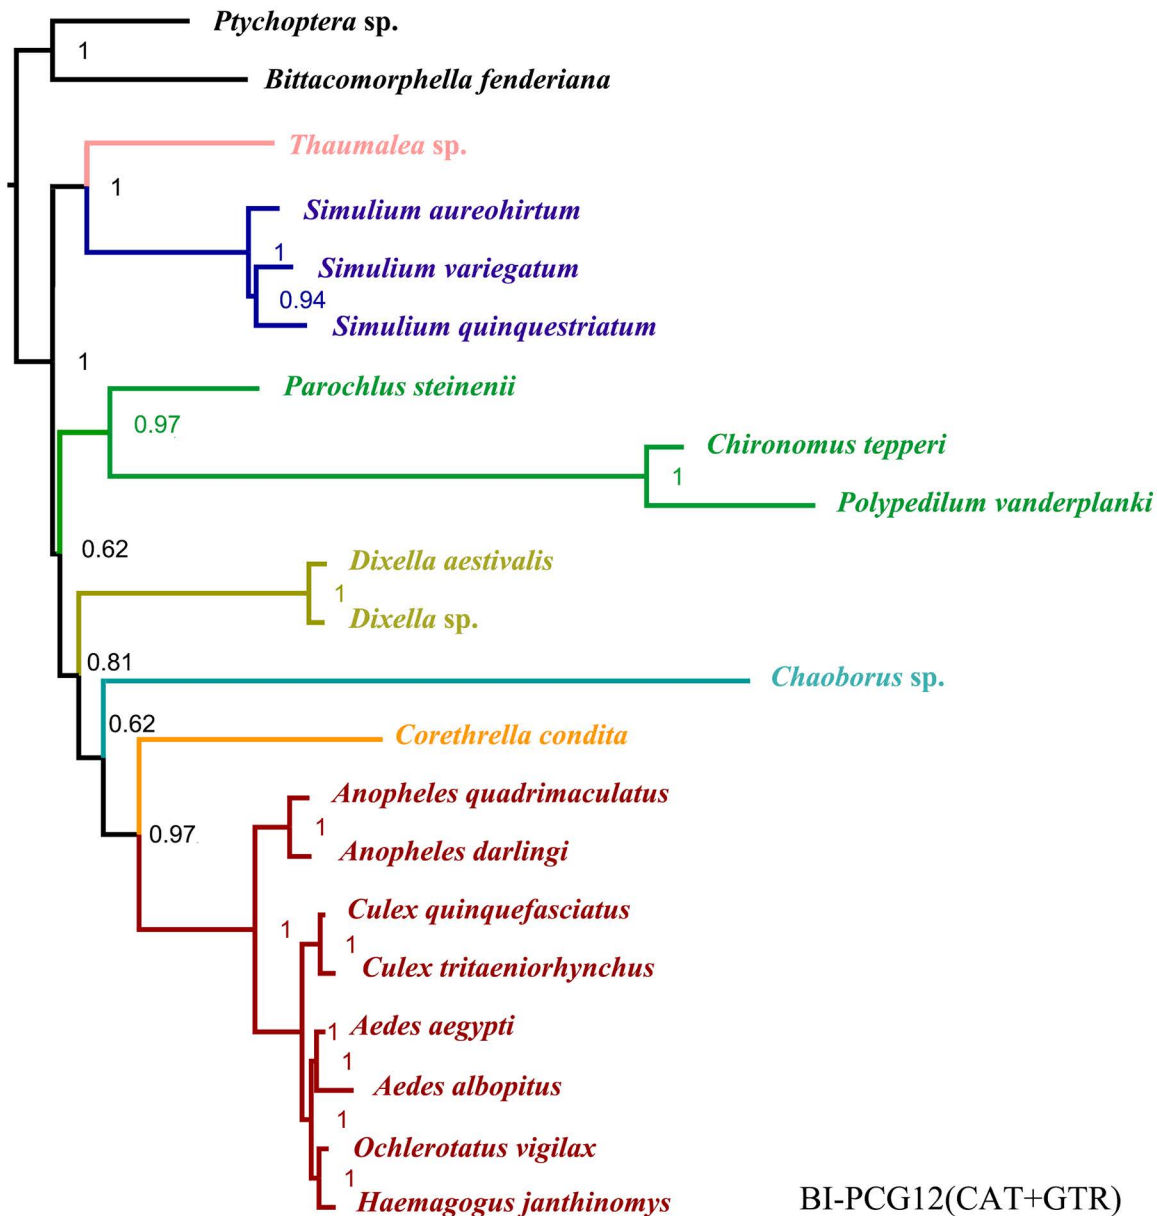

BI-PCG12(CAT+GTR)  
(Removing Ceratopogonidae)

0.2

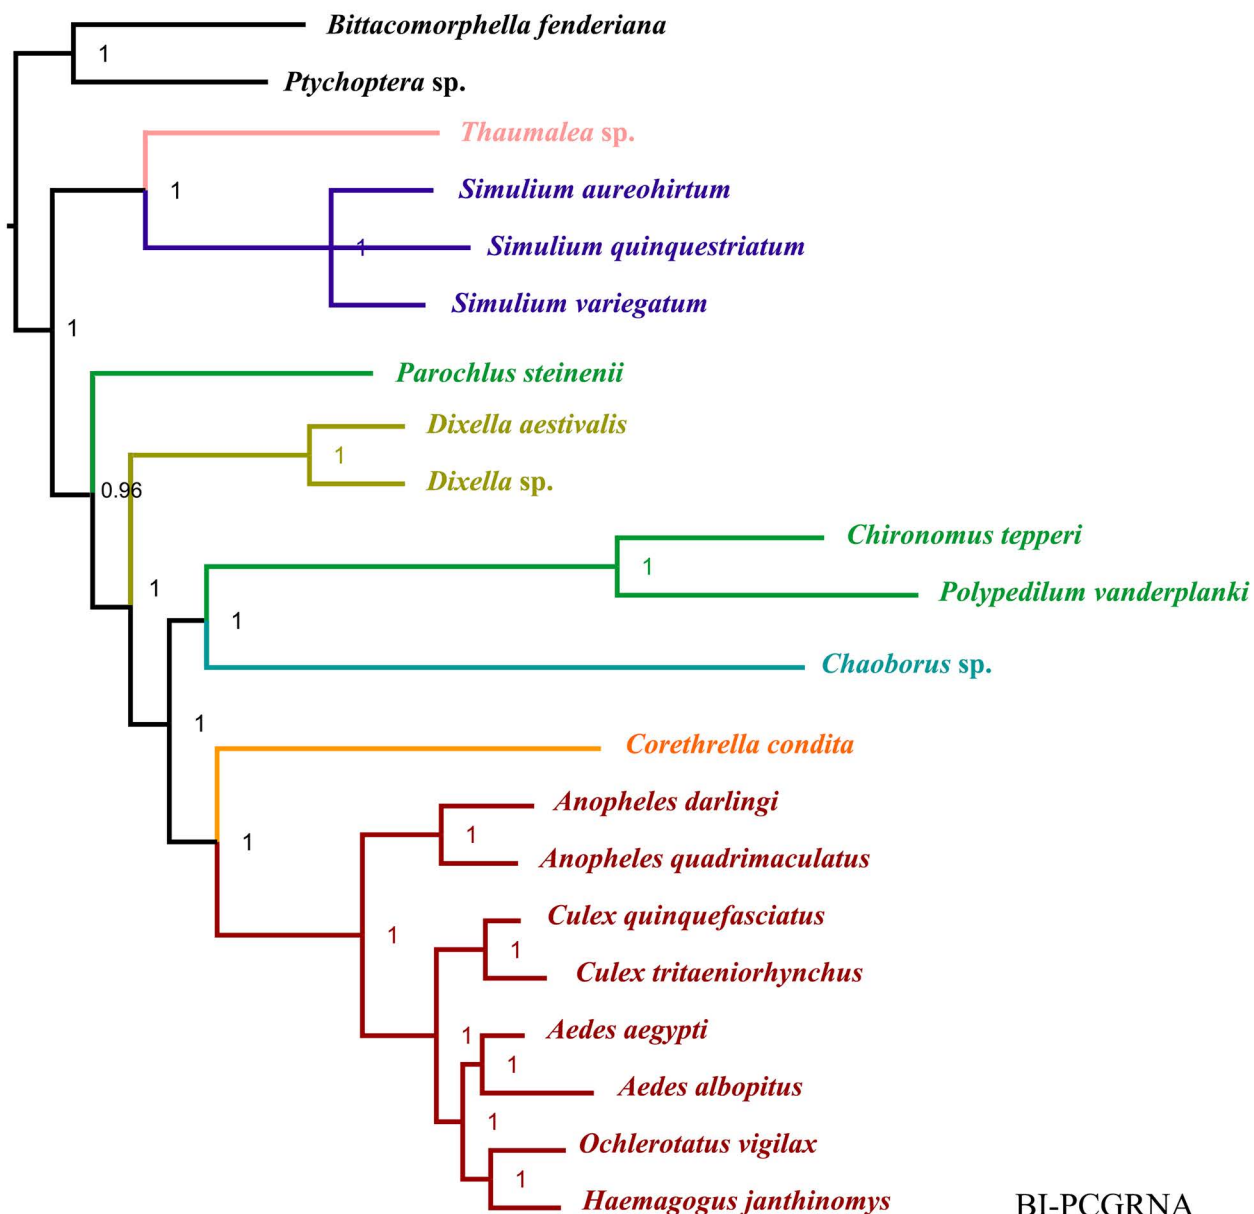

BI-PCGRNA  
(Removing Ceratopogonidae)

0.3

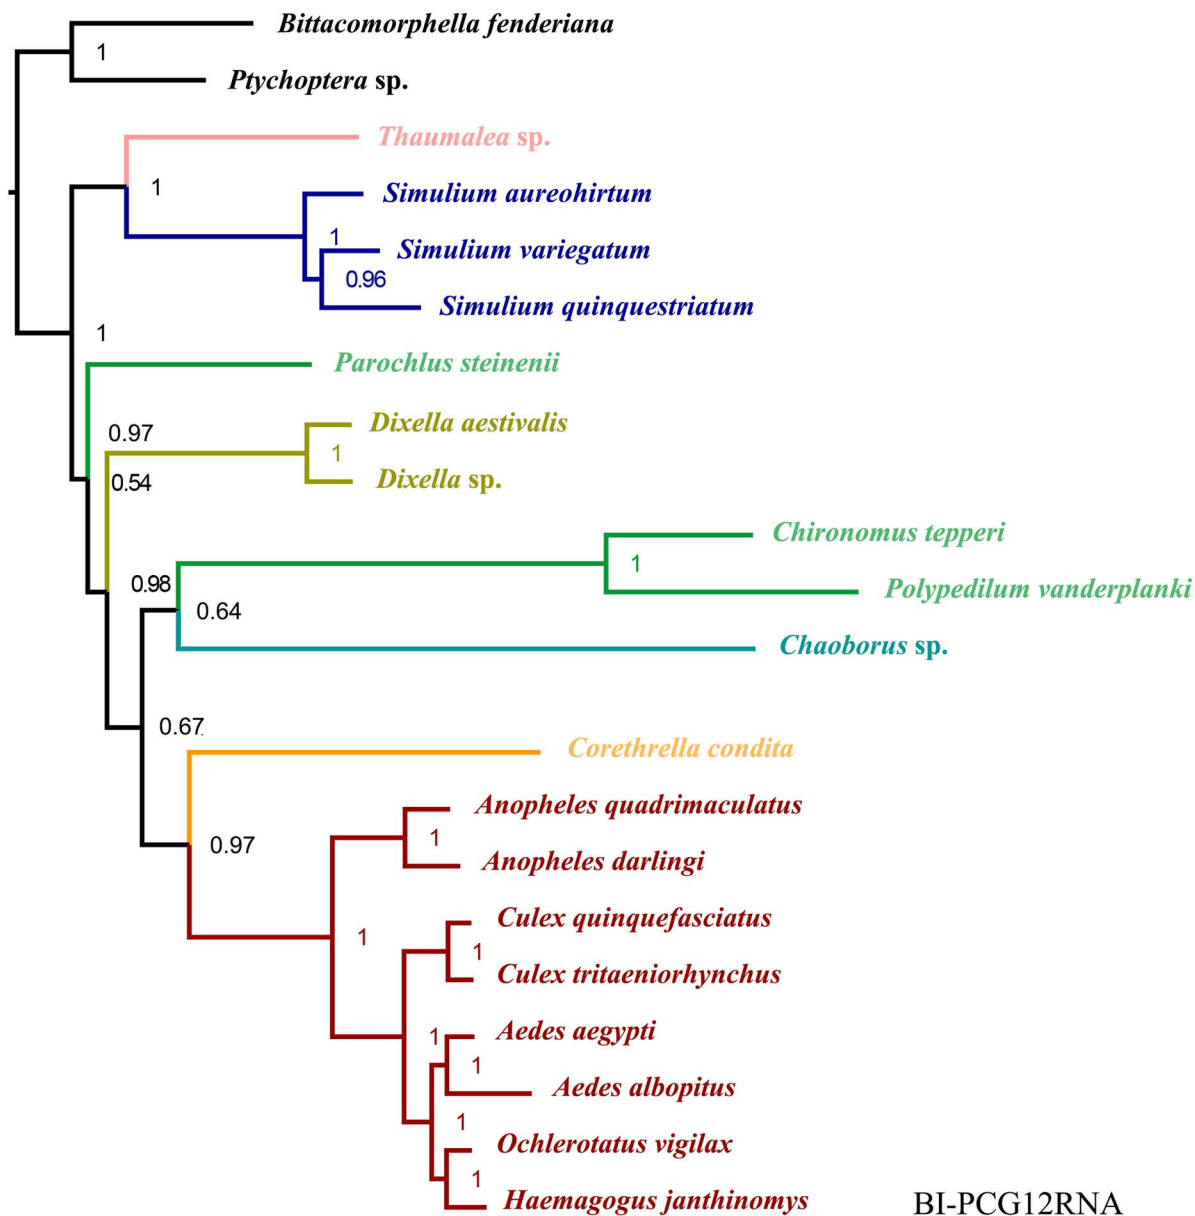

BI-PCG12RNA  
(Removing Ceratopogonidae)

0.05

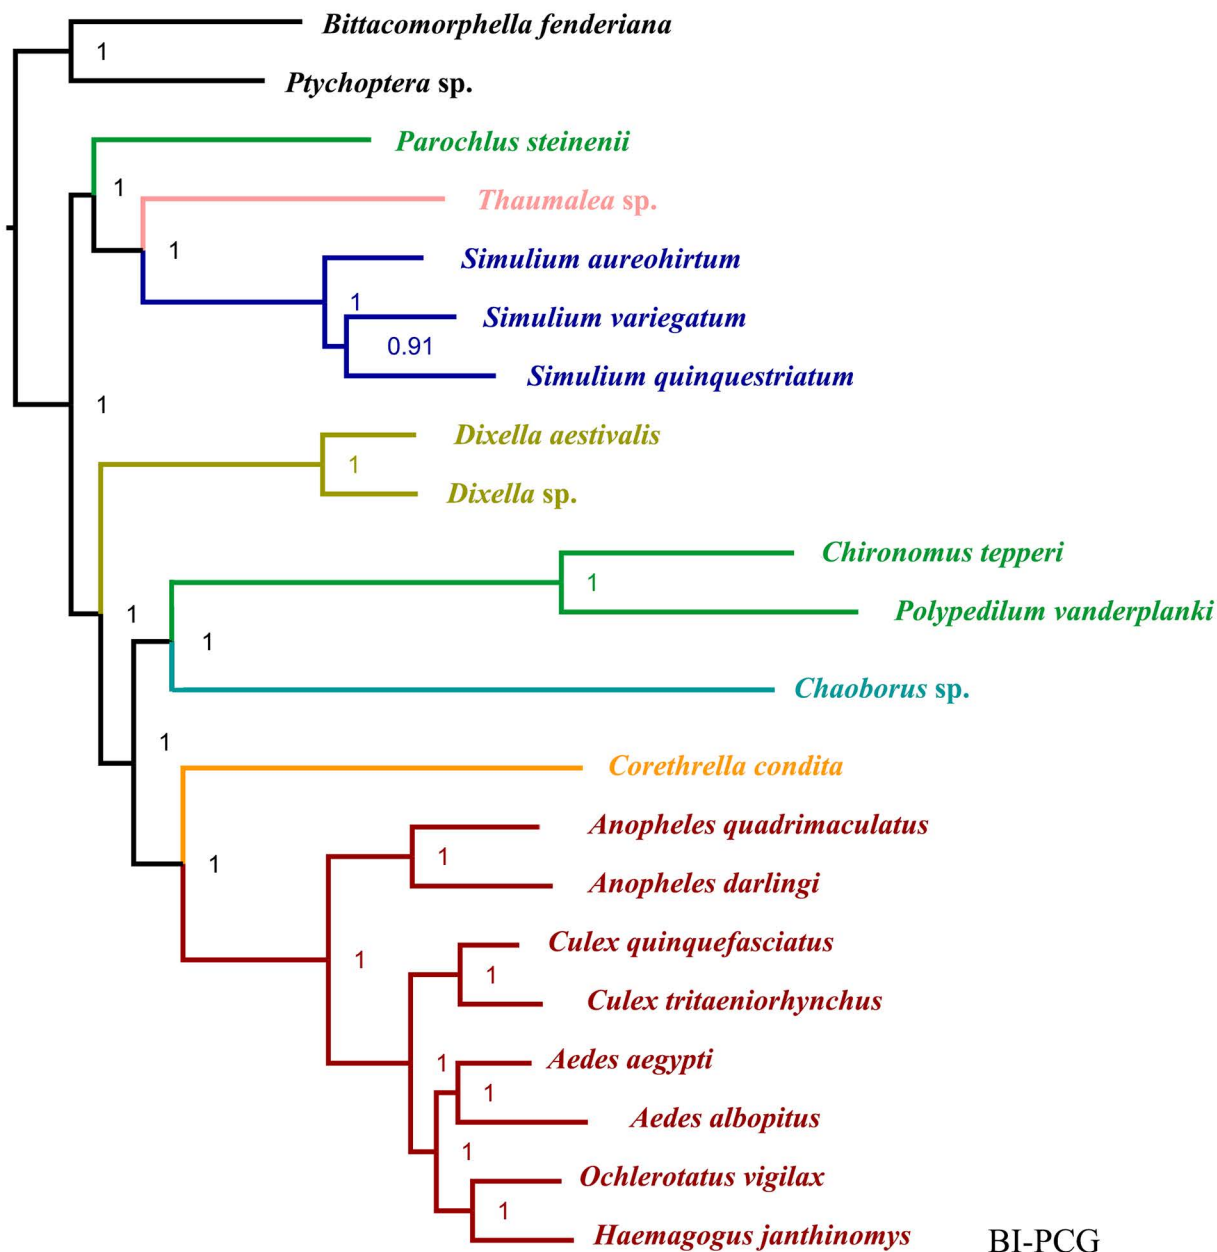

BI-PCG  
(Removing Ceratopogonidae)

0.3

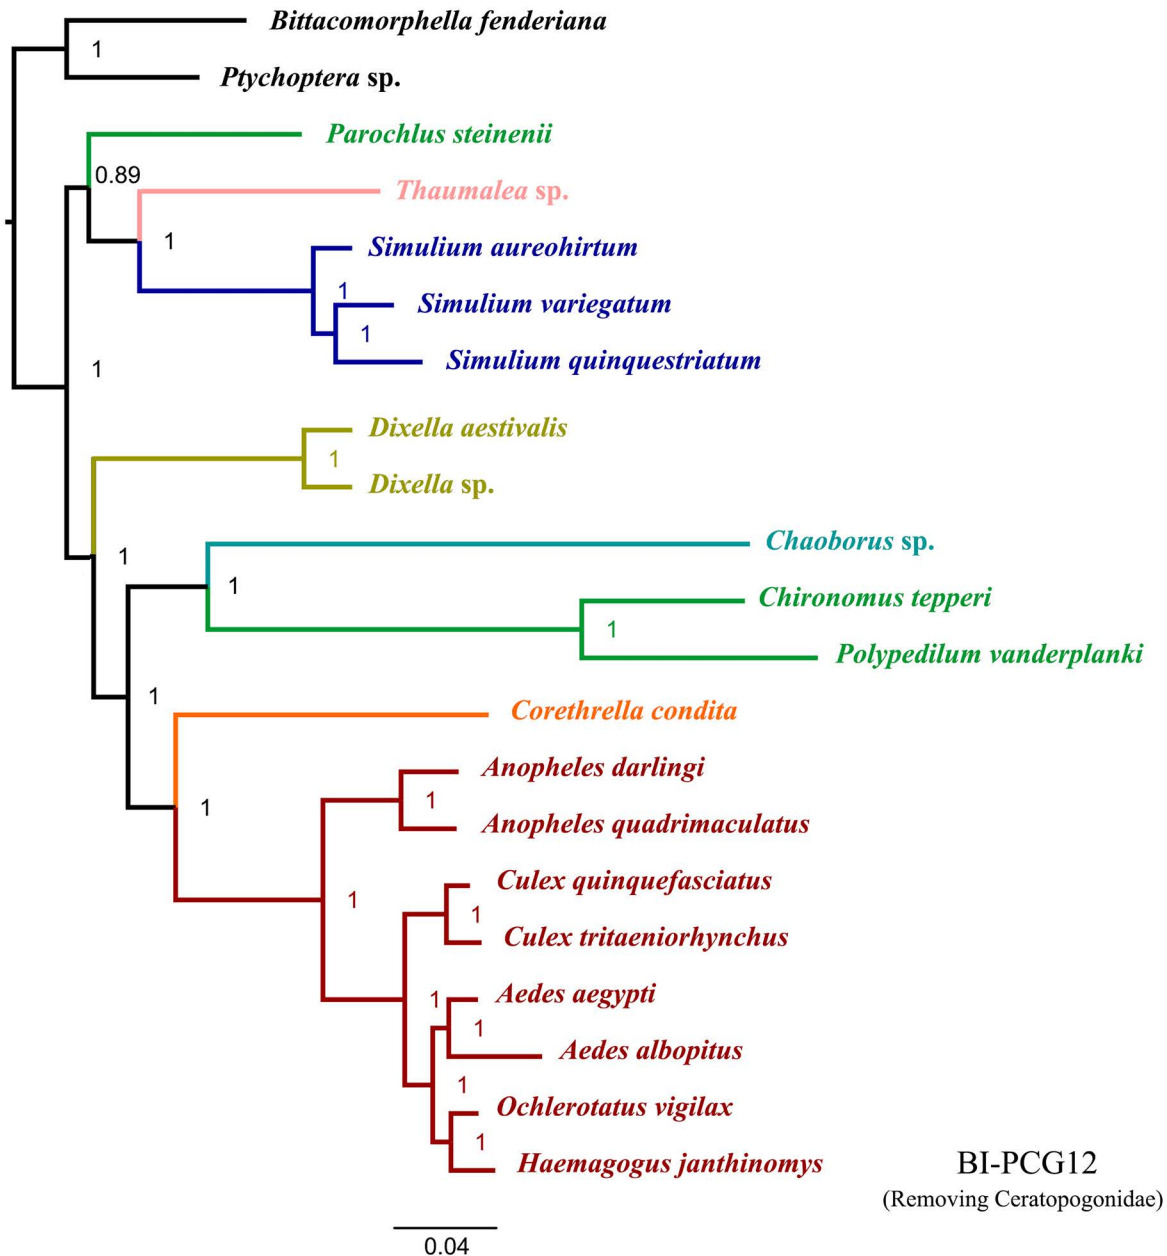

BI-PCG12  
(Removing Ceratopogonidae)

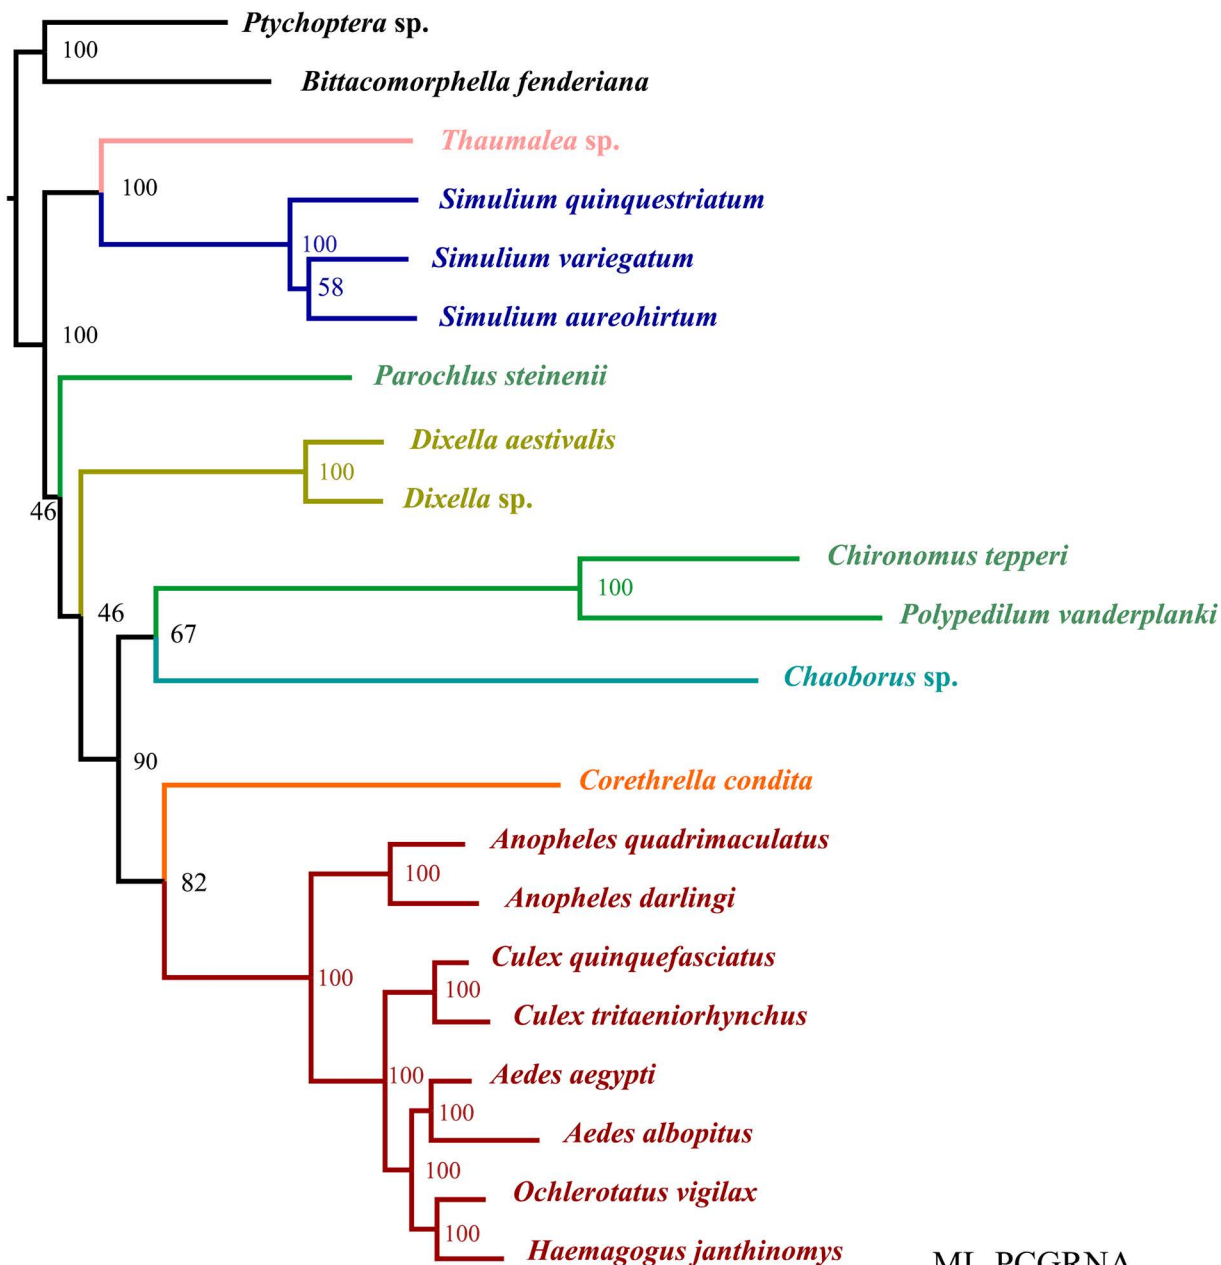

ML-PCGRNA  
(Removing Ceratopogonidae)

0.6

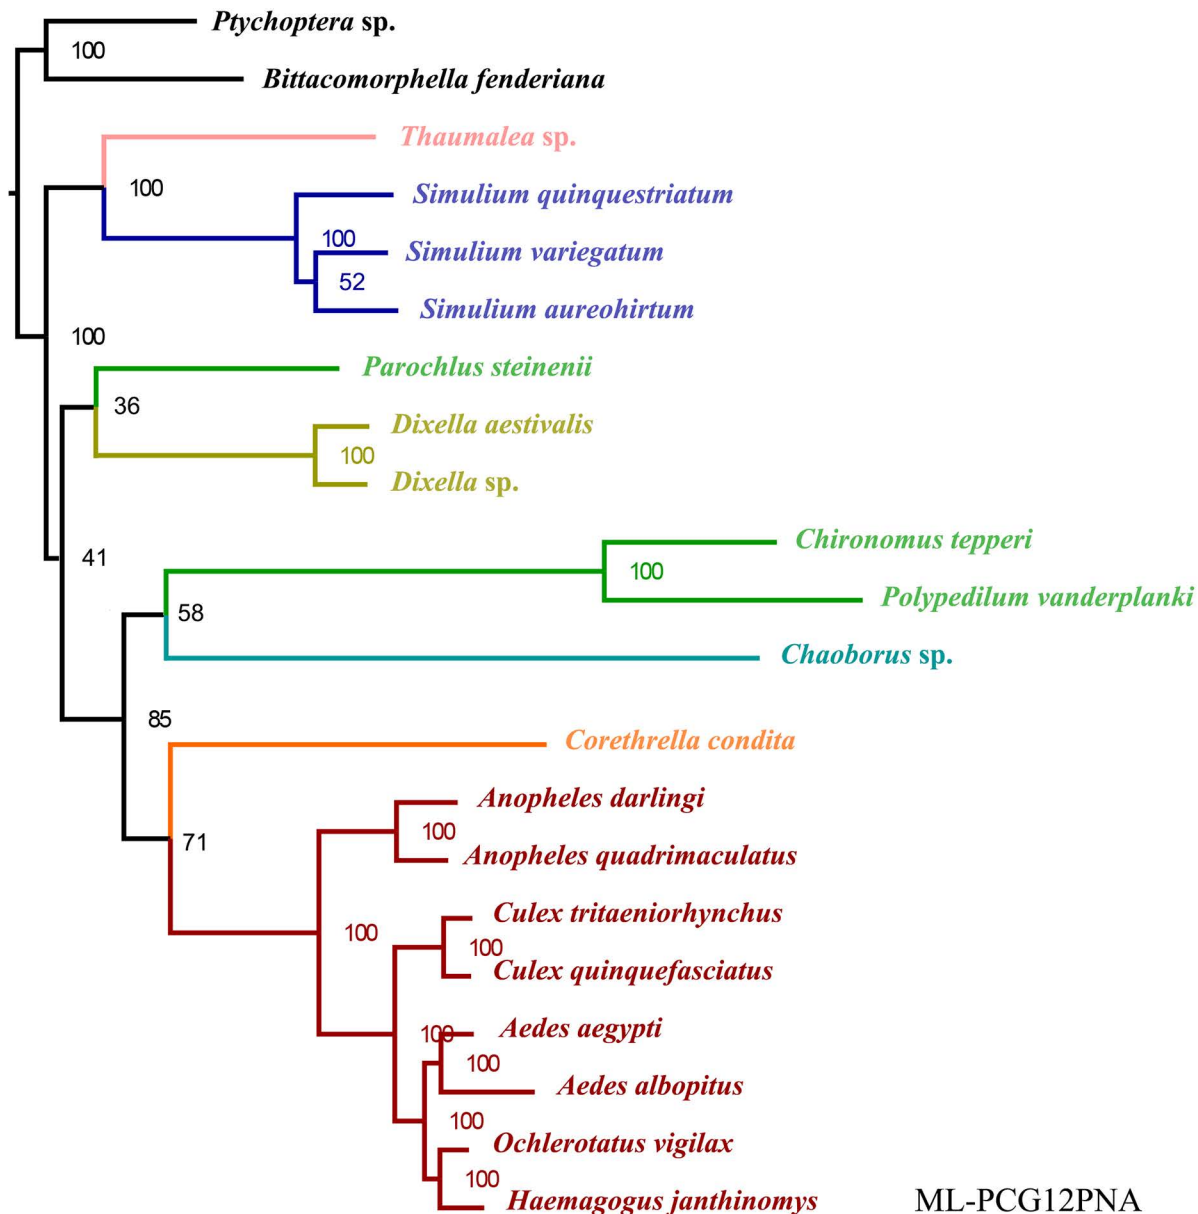

ML-PCG12PNA  
(Removing Ceratopogonidae)

0.07

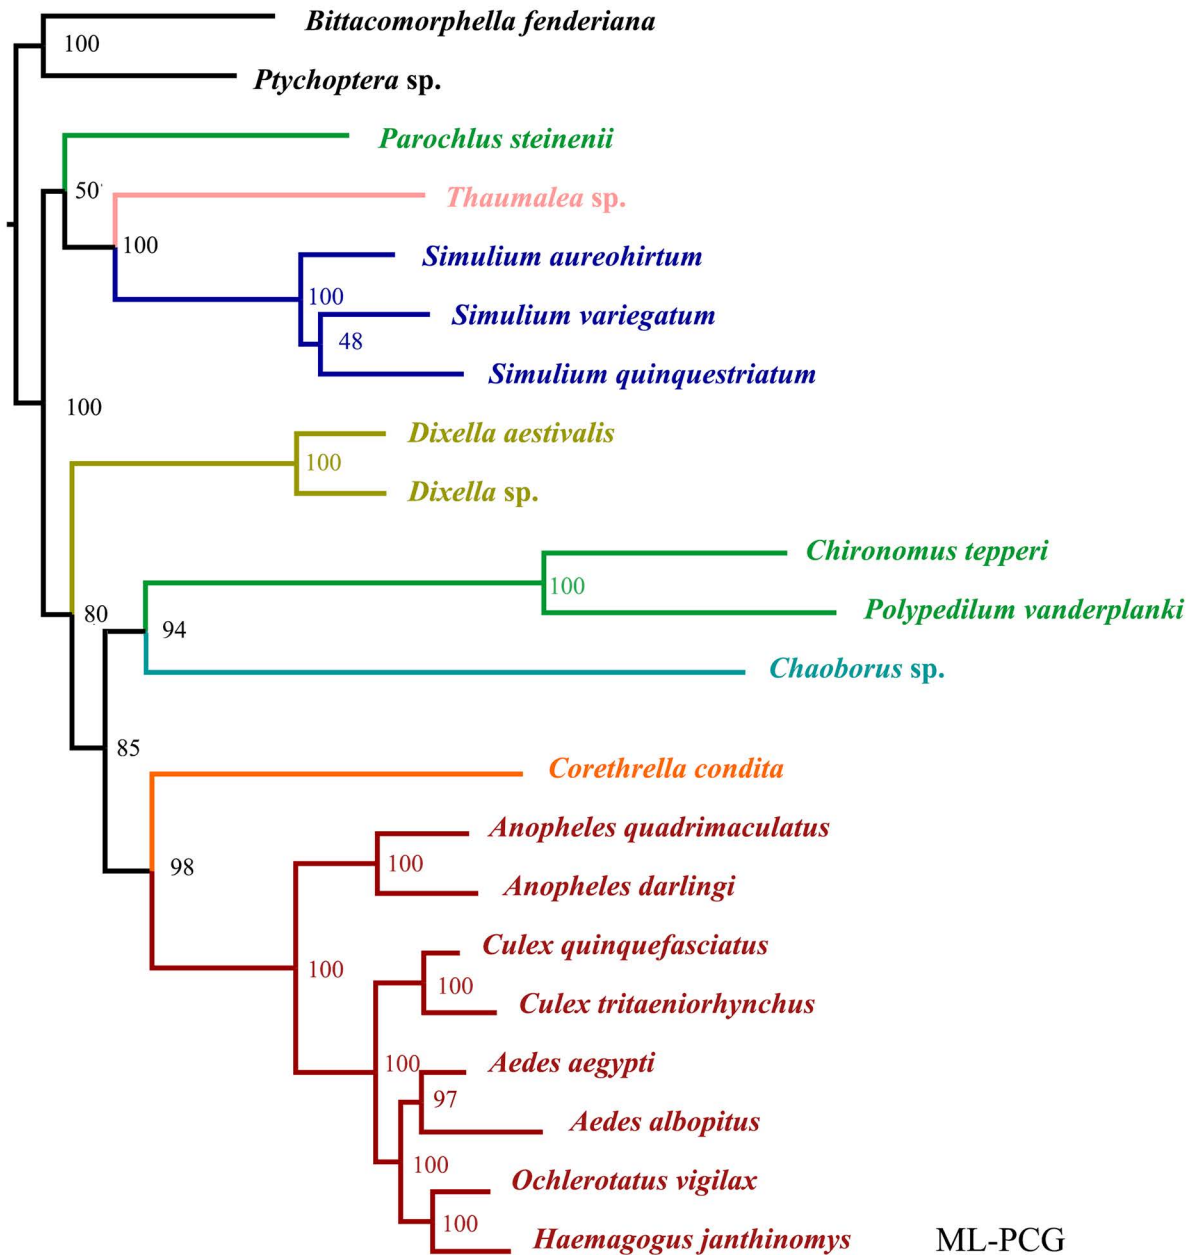

ML-PCG  
(Removing Ceratopogonidae)

2.0

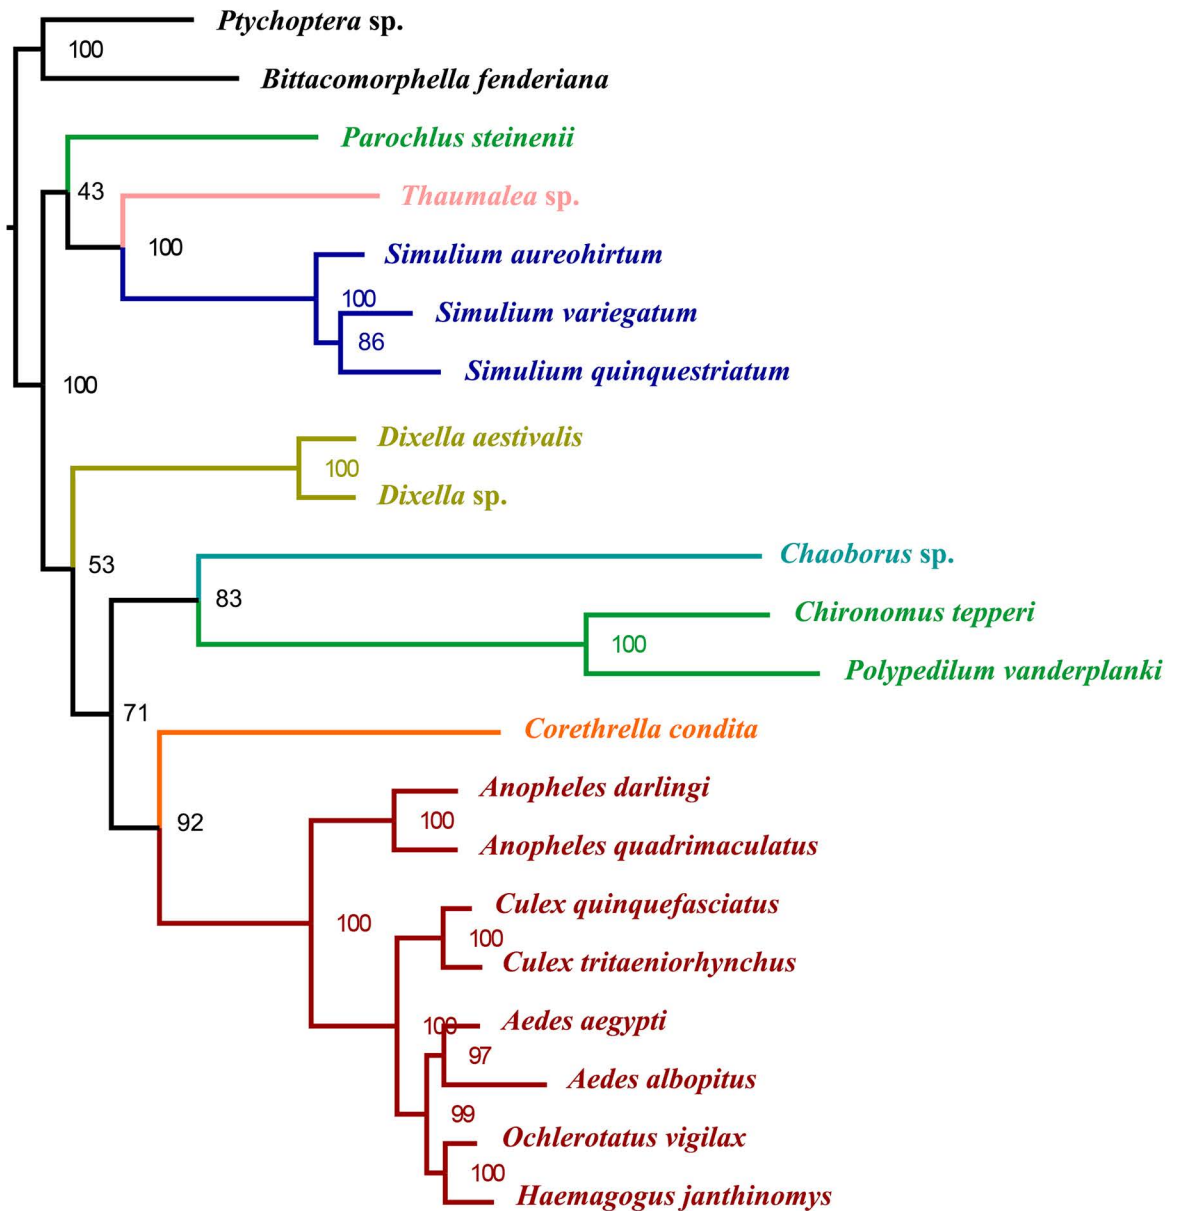

0.08

ML-PCG12  
(Removing Ceratopogonidae)
